# Supplementary material for: Dual-Heterojunctions Enhanced High Sodium Storage Capacity and Rapid Reaction Kinetics of Na₃V₂(PO₄)2F3 Cathode for Sodium-Ion Batteries
Source: Research Square preprint supplement (doi:10.21203/rs.3.rs-8250429/v1), 2026-01-12
Supplement: Supplementary file 1 [file a55756a8af13e07a179a678f.docx]

**Supplementary Information**

**Dual-Heterojunctions Enhanced High Sodium Storage Capacity and Rapid Reaction Kinetics of Na₃V₂(PO₄)2F3 Cathode for Sodium-Ion Batteries**

Shoujie Guo1, Zixuan Xu1, Haixiang Mu1, Yukun Guo1, Qingyin Shen1, Yi Sun1, Qinyao Zhang1, Bo Zhang2, Ming Qin2, Wenjun Fa1,3*, Pinjiang Li1* and Lijun Wu1*

1 M.S. Shoujie Guo, Prof. Lijun Wu, Prof. Pinjiang Li, Prof. Wenjun Fa, B.S. Qingyin Shen, B.S. Zixuan Xu, B.S. Yi Sun, B.S. Yukun Guo, B.S. Haixiang Mu, B.S. Qinyao Zhang.

College of Chemistry and Chemical Engineering, Xuchang University, Xuchang 461000, China

2 B.S. Bo Zhang, B.S. Ming Qin.

College of Electrical Engineering, Xuchang University, Xuchang 461000, China

3 Institute of Laser Manufacturing, Henan Academy of Sciences, Zhengzhou 450046, China

* Prof. Lijun Wu,

wlj197908@xcu.edu.cn

Prof. Wenjun Fa

fa_wenjun@163.com

Prof. Pinjiang Li

12008012@xcu.edu.cn


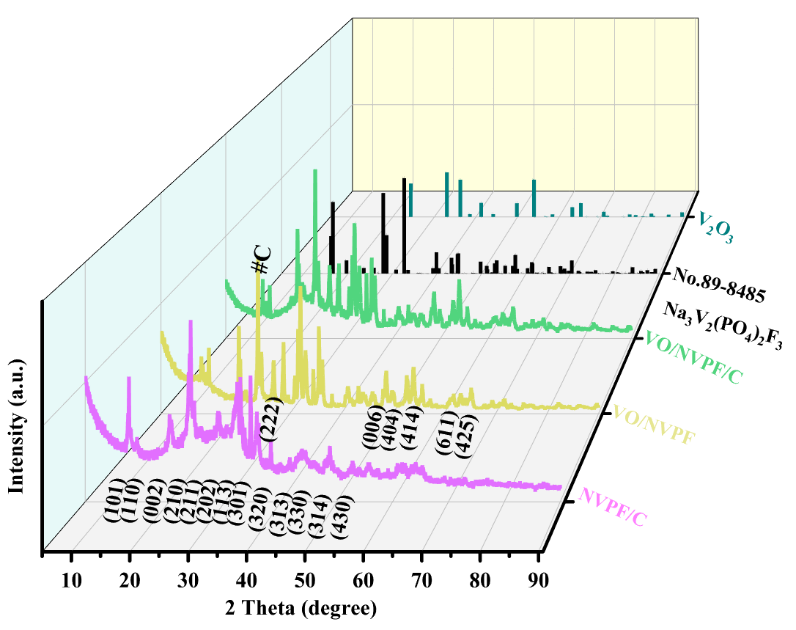


Figure S1 The XRD data of V2O3, Na3V2(PO4)2F3, NVPF/C, VO/NVPF and VO/NVPF/C.


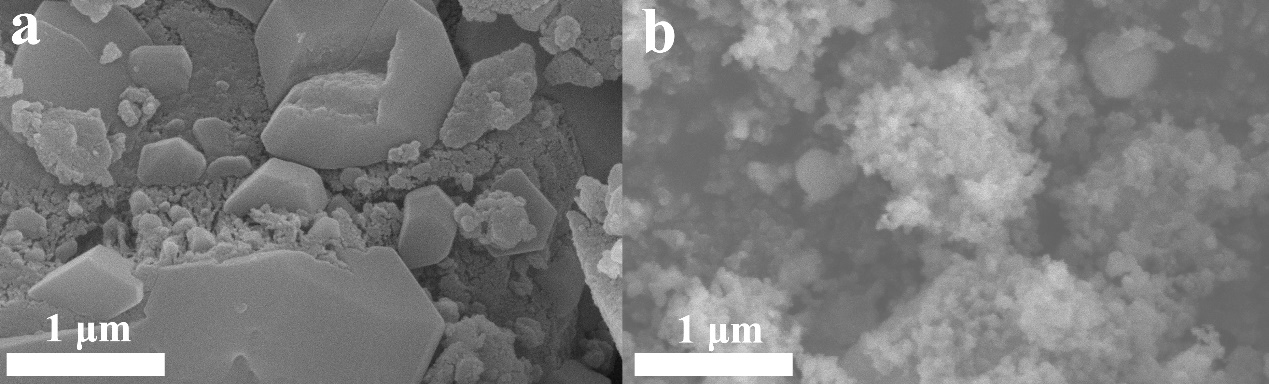


Figure S2 FESEM for a) VO/NVPF and b) NVPF/C.


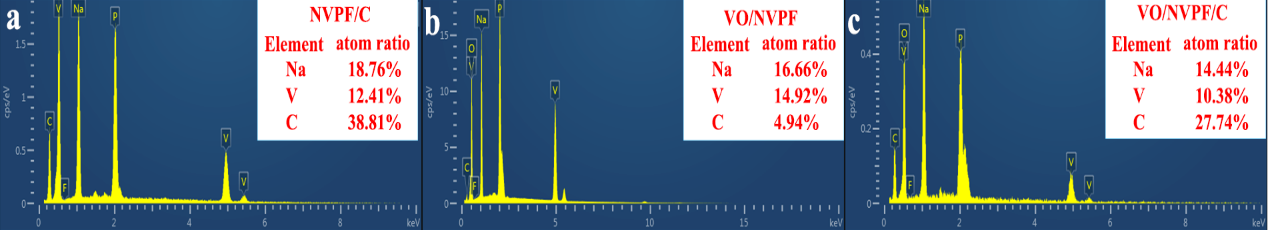


Figure S3 The results of EDS for a) NVPF/C, b) VO/NVPF and VO/NVPF/C.


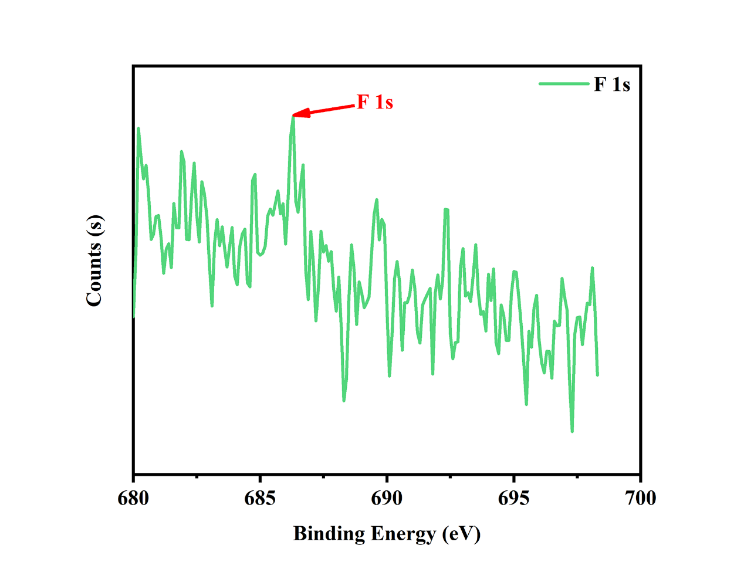


Figure S4 The fine spectrum of XPS for F1s.


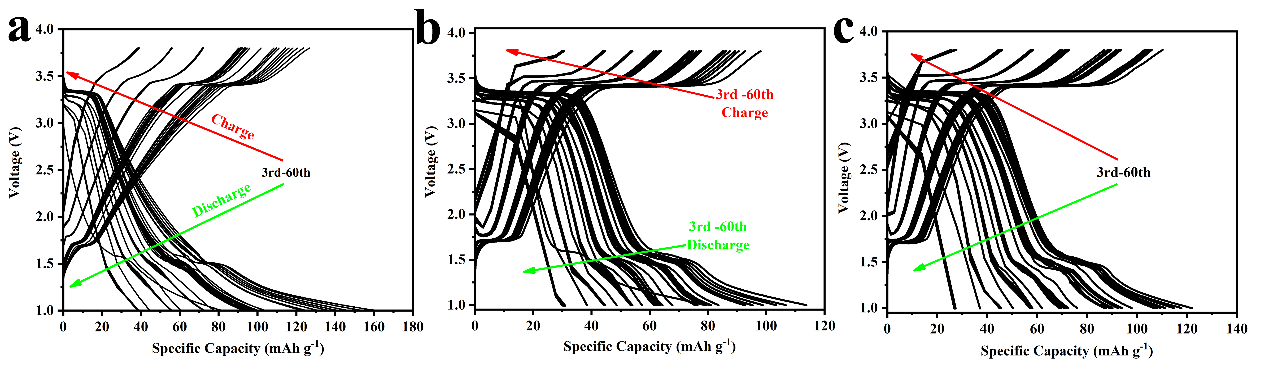


Figure S5 Specific capacity-voltage curves at various rate density for (a) VO/NVPF/C, (b) NVPF/C and (c) VO/NVPF versus Na metal.


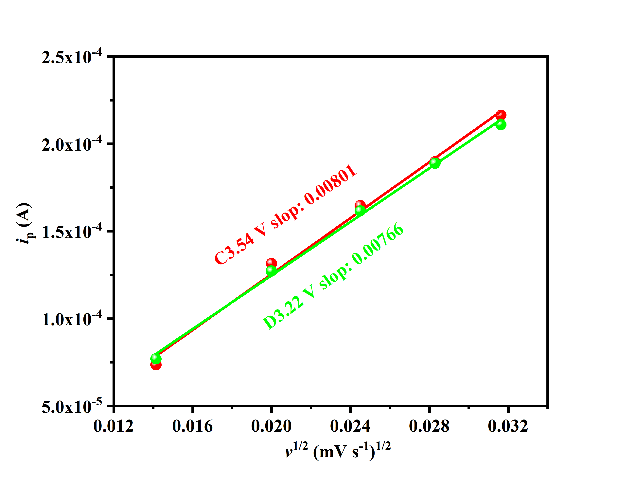


Figure S6 The linear fitting of charging and discharging peak currents at 3.56 V and 3.22 V versus square of scan rates for 0.2 mV s-1, 0.4 mV s-1, 0.6 mV s-1, 0.8 mV s-1, and 1.0 mV s-1, (The slope is corresponding to 0.4463*z3/2F3/2CNaAR-1/2T-1/2DNa1/2*).


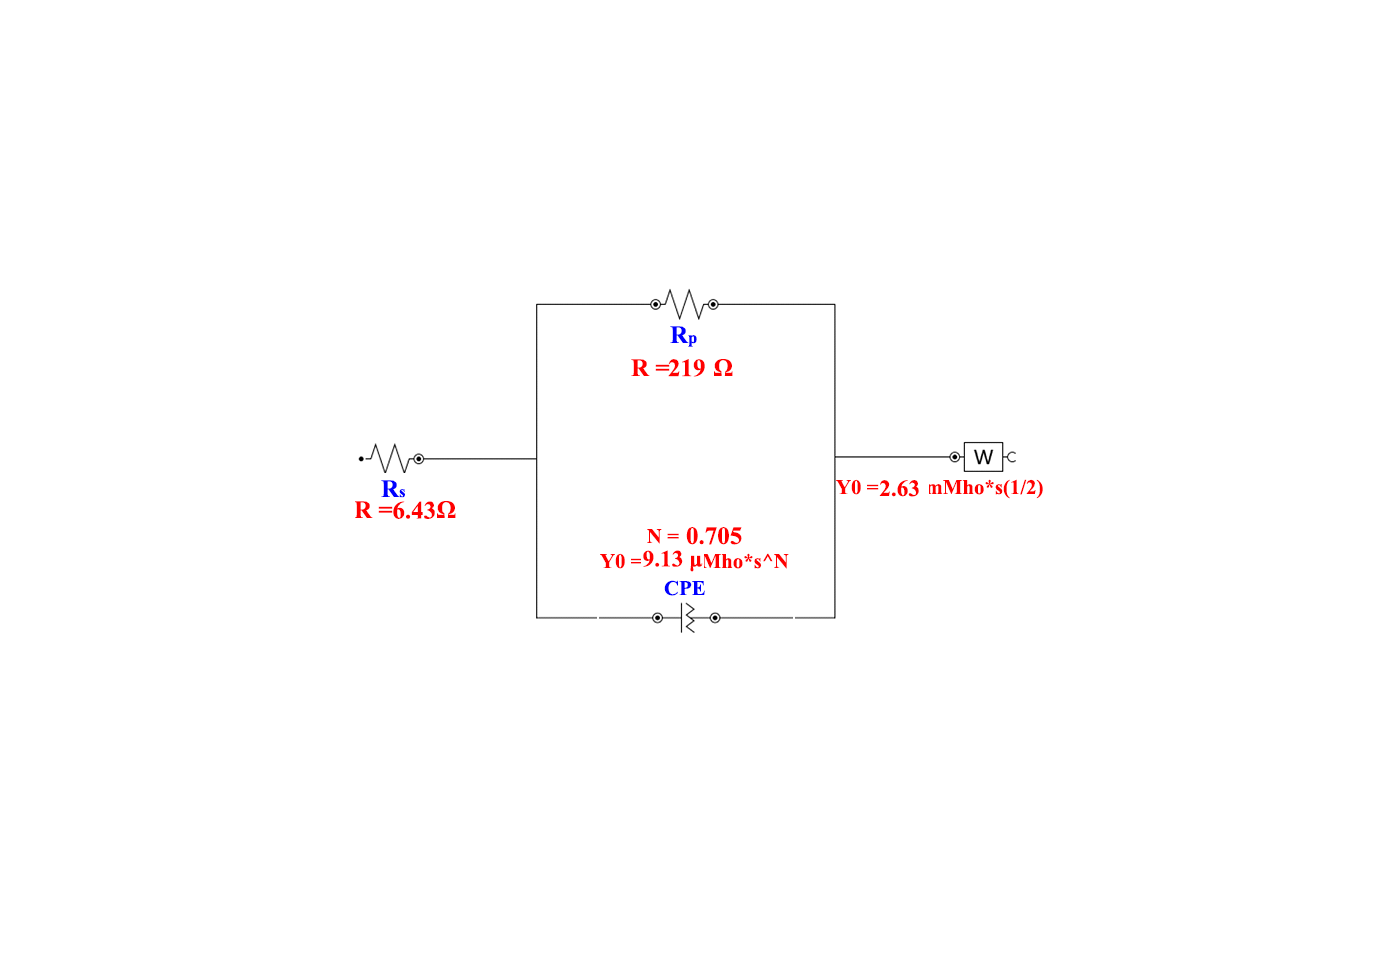


Figure S7 The equivalent circuit diagram before 1400 cycles.
